# Supplementary material for: Association study between XPG Asp1104His polymorphism and colorectal cancer risk in a Chinese population
Source: PubMed Central journal article supplement — Sci Rep. 2014 Oct 21;4:6700. doi: 10.1038/srep06700 (PMC4204027; doi:10.1038/srep06700), 2014-10-21
Supplement: srep06700-s1.pdf [file srep06700-s1.pdf]

Supplementary Information for Association study between *XPG*  
Asp1104His polymorphism and colorectal cancer risk in a Chinese  
population

Haina Du<sup>1</sup>✉, Xizhi Zhang<sup>2</sup>✉, Mulong Du<sup>3,4</sup>✉, Nannan Guo<sup>1</sup>, Zhipeng Chen<sup>5</sup>, Yongqian Shu<sup>1</sup>, Zhengdong Zhang<sup>3,4</sup>, Meilin Wang<sup>3,4</sup>, Lingjun Zhu<sup>1\*</sup>

<sup>1</sup> Department of Oncology, The First Affiliated Hospital of Nanjing Medical University, Nanjing, China.

<sup>2</sup> Department of Medical Oncology, Subei People's Hospital, Clinical Medical College of Yangzhou University, Yangzhou, China

<sup>3</sup> Department of Environmental Genomics, Jiangsu Key Laboratory of Cancer Biomarkers, Prevention and Treatment, Cancer Center, Nanjing Medical University, Nanjing, China

<sup>4</sup> Department of Genetic Toxicology, the Key Laboratory of Modern Toxicology of Ministry of Education, School of Public Health, Nanjing Medical University, Nanjing, China

<sup>5</sup> Department of Oncology, The first people's Hospital of Zhangjiagang City, Suzhou, China.

✉ These three authors contributed equally to this work.

\* corresponding author:

Lingjun Zhu: Department of Oncology, The First Affiliated Hospital of Nanjing Medical University, 300 Guangzhou Rd, Nanjing 210029, Nanjing, China; Cell phone: (0)13951807457;

E-mail address: zhulingjun@njmu.edu.cn

**Table S1.** The baseline characteristics of all qualified studies in this meta-analysis.

| Study   | year | country | Ethnicity | Design | Case/control | Genotype distribution |     |     |      |     |          |     |     |      |     | HWE<br>for <i>P</i> | MAF                                    |
|---------|------|---------|-----------|--------|--------------|-----------------------|-----|-----|------|-----|----------|-----|-----|------|-----|---------------------|----------------------------------------|
|         |      |         |           |        |              | cases                 |     |     |      |     | controls |     |     |      |     |                     |                                        |
|         |      |         |           |        |              | GG                    | GC  | CC  | G    | C   | GG       | GC  | CC  | G    | C   |                     |                                        |
| Pardini | 2008 | Czech   | Caucasian | HB     | 532/532      | 334                   | 177 | 21  | 845  | 219 | 356      | 153 | 23  | 865  | 199 | 0.21                | 0.187 <sup>a</sup> /0.267 <sup>b</sup> |
| Emel    | 2011 | Turkish | Caucasian | PB     | 79/247       | 43                    | 34  | 2   | 120  | 38  | 148      | 83  | 16  | 379  | 115 | 0.35                | 0.232 <sup>a</sup> /0.267 <sup>b</sup> |
| Gil     | 2012 | Polish  | Caucasian | HB     | 132/100      | 86                    | 35  | 11  | 207  | 57  | 64       | 31  | 5   | 159  | 41  | 0.62                | 0.205 <sup>a</sup> /0.267 <sup>b</sup> |
| Liu     | 2012 | China   | Asian     | HB     | 1028/1085    | 233                   | 603 | 192 | 1069 | 987 | 329      | 537 | 219 | 1195 | 975 | 0.99                | 0.449 <sup>a</sup> /0.444 <sup>b</sup> |
| zhu     | 2013 | China   | Asian     | HB     | 878/884      | 286                   | 459 | 133 | 1031 | 725 | 355      | 405 | 124 | 1115 | 653 | 0.62                | 0.369 <sup>a</sup> /0.444 <sup>b</sup> |

<sup>a</sup> the MAF in our study;

<sup>b</sup> the MAF in the HapMap database

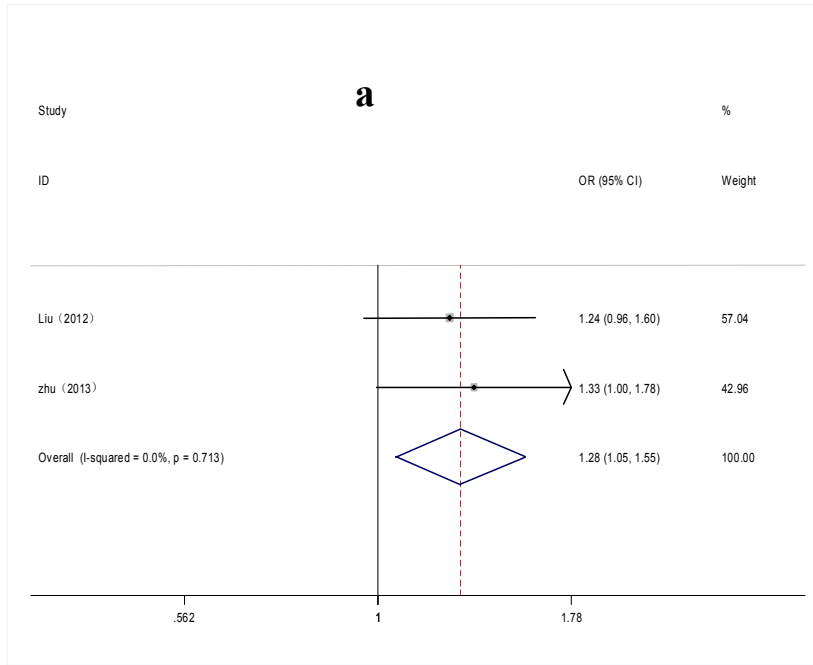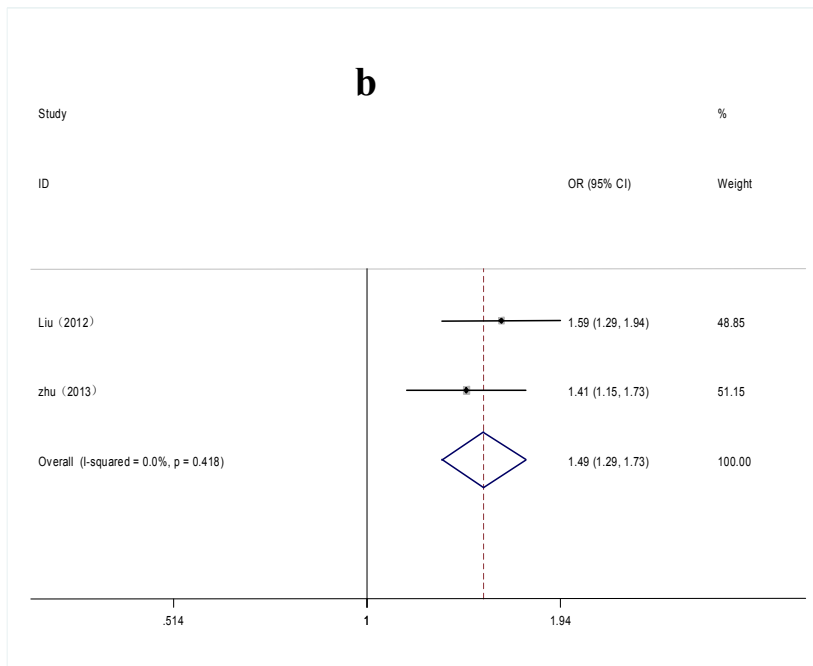

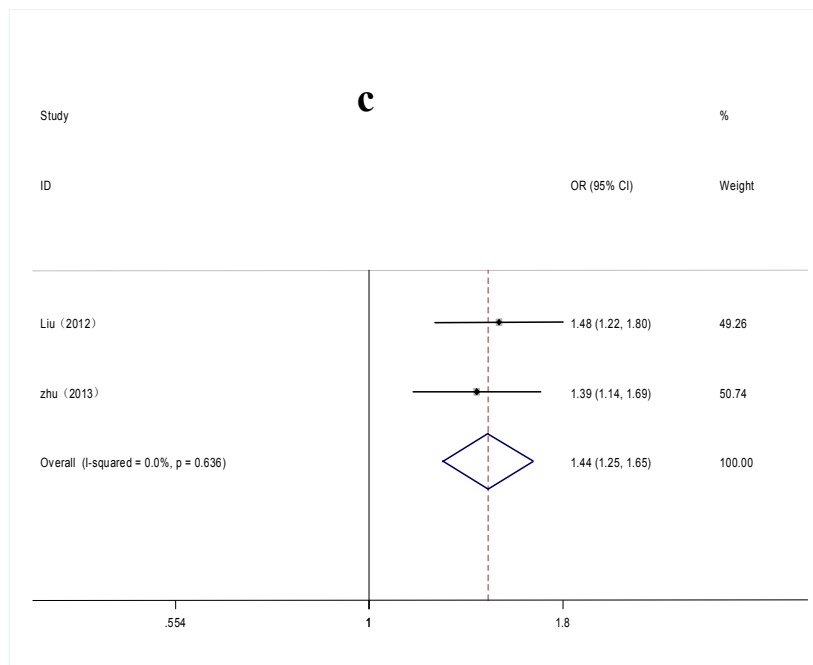

**Figure S1.** Odds ratios (ORs) for associations between *XPG* Asp1104His polymorphism and colorectal cancer in Asian populations. (based on all models: (a) His/His vs. Asp/Asp, (b) Asp/His vs. Asp/Asp, (c) His/His + Asp/His vs. Asp/Asp)
